# Supplementary material for: Repression of HIV-1 reactivation mediated by CRISPR/dCas9-KRAB in lymphoid and myeloid cell models
Source: Retrovirology. 2022 Jun 22;19:12. doi: 10.1186/s12977-022-00600-9 (PMC9215058; doi:10.1186/s12977-022-00600-9)
Supplement: Supplementary file 1 — Additional file 1: sgRNA oligos and primers used for sequencing and PCR proceedings. [file 12977_2022_600_MOESM1_ESM.xlsx]

## Sheet: Planilha1
Primers	Sequencia		sgRNA oligos/Primers
U6	5 'GAGGGCCTATTTCCCATGATTCC 3'		LTR1	5' CCACGTGATGAAATGCTAGG 3'
				5' CCTAGCATTTCATCACGTGG 3'
gRNA scaffolfd	5' CCGACTCGGTGCCACTTTTTC 3'		LTR2	5' CCGCCTAGCATTTCATCACG 3'
				5' CGTGATGAAATGCTAGGCGG 3'
			LTR3	5' TGCCTGGCTAGAAGCACAAG 3'
				5' CTTGGTGCTTCTAGCCAGGCA 3'
			LTR4	5' CTGTGGATCTACCACACACA 3'
				5' TGTGTGTGGTAGATCCACAG 3'
			LTR5	5' CTACAAGGGACTTTCCGCTG 3'
				5' CAGCGGAAAGTCCCTTGTAG 3'
			AAVS1	5' GGGGCCACTAGGGACAGGAT 3'
				5' ATCCTGTCCCTAGTGGCCCC 3'
