# Supplementary material for: Repression of HIV-1 reactivation mediated by CRISPR/dCas9-KRAB in lymphoid and myeloid cell models
Source: Retrovirology. 2022 Jun 22;19:12. doi: 10.1186/s12977-022-00600-9 (PMC9215058; doi:10.1186/s12977-022-00600-9)
Supplement: Supplementary file 2 — Additional file 2: 98 design sgRNA from CRISPRPick tool. [file 12977_2022_600_MOESM2_ESM.xlsx]

## Sheet: sgrna-designs - dCas9-KRAB - pl
Input	Quota	Target Taxon	CRISPR Mechanism	Strand of sgRNA	Orientation	sgRNA Cut Position (1-based)	sgRNA Sequence	sgRNA Context Sequence	PAM Sequence	Target Cut Length	Target Cut %	# Off-Target Tier I Match Bin I Matches	# Off-Target Tier II Match Bin I Matches	# Off-Target Tier III Match Bin I Matches	# Off-Target Tier IV Match Bin I Matches	# Off-Target Tier I Match Bin II Matches	# Off-Target Tier II Match Bin II Matches	# Off-Target Tier III Match Bin II Matches	# Off-Target Tier IV Match Bin II Matches	# Off-Target Tier I Match Bin III Matches	# Off-Target Tier II Match Bin III Matches	# Off-Target Tier III Match Bin III Matches	# Off-Target Tier IV Match Bin III Matches	# Off-Target Tier I Match Bin IV Matches	# Off-Target Tier II Match Bin IV Matches	# Off-Target Tier III Match Bin IV Matches	# Off-Target Tier IV Match Bin IV Matches	On-Target Ruleset	On-Target Efficacy Score	On-Target Rank	Off-Target Rank	On-Target Rank Weight	Off-Target Rank Weight	Combined Rank	Pick Order	Picking Round	Picking Notes
Input Sequence	5	9606	CRISPRko		antisense	462	CCACGTGATGAAATGCTAGG	CGGGCCACGTGATGAAATGCTAGGCGGCTG	CGG	461	64.5	0	0	0	0	1	40	12	31	1	36	23	28	2	37	10	41	Azimuth_2.0	0.7556	2	20	1.0	1.0	1	1	1
Input Sequence	5	9606	CRISPRko		sense	473	CCGCCTAGCATTTCATCACG	ACAGCCGCCTAGCATTTCATCACGTGGCCC	TGG	472	66.0	0	0	0	0	0	28	11	39	1	42	16	39	1	33	13	41	Azimuth_2.0	0.5823	22	4	1.0	1.0	2			Outside Target Window: 5-65%; Spacing Violation: Too close to earlier pick at position 461
Input Sequence	5	9606	CRISPRko		sense	77	TGCCTGGCTAGAAGCACAAG	CTTGTGCCTGGCTAGAAGCACAAGAGGAGG	AGG	76	10.6	0	0	0	0	1	52	12	52	3	87	39	69	6	141	50	153	Azimuth_2.0	0.6667	6	22	1.0	1.0	3	2	1
Input Sequence	5	9606	CRISPRko		sense	246	CTGTGGATCTACCACACACA	TGATCTGTGGATCTACCACACACAAGGCTA	AGG	245	34.3	0	0	0	0	1	43	20	38	2	66	20	64	4	102	44	105	Azimuth_2.0	0.6544	8	21	1.0	1.0	4	3	1
Input Sequence	5	9606	CRISPRko		sense	545	CTACAAGGGACTTTCCGCTG	CTTGCTACAAGGGACTTTCCGCTGGGGACT	GGG	544	76.1	0	0	0	0	1	25	14	20	4	47	16	38	4	69	23	58	Azimuth_2.0	0.5928	20	14	1.0	1.0	5			Outside Target Window: 5-65%
Input Sequence	5	9606	CRISPRko		antisense	386	GCTCACAGGGTGTAACAAGC	GCAGGCTCACAGGGTGTAACAAGCTGGTGT	TGG	385	53.8	0	0	0	0	0	27	18	30	2	59	25	77	4	78	30	68	Azimuth_2.0	0.5660	31	3	1.0	1.0	6	4	1
Input Sequence	5	9606	CRISPRko		sense	666	GTTAGACCAGATTTGAGCCT	TCTGGTTAGACCAGATTTGAGCCTGGGAGC	GGG	665	93.0	0	0	0	0	0	117	29	98	4	155	67	155	2	190	60	158	Azimuth_2.0	0.5801	25	11	1.0	1.0	7			Outside Target Window: 5-65%
Input Sequence	5	9606	CRISPRko		antisense	426	ACTCTAACACTTCTCTCTCA	CTCCACTCTAACACTTCTCTCTCAGGGTCA	GGG	425	59.4	0	0	0	0	1	98	35	78	6	119	43	104	4	214	70	215	Azimuth_2.0	0.6288	13	26	1.0	1.0	8	5	1
Input Sequence	5	9606	CRISPRko		sense	686	GGGAGCTCTCTGGCTAACTA	GCCTGGGAGCTCTCTGGCTAACTAGGGAAC	GGG	685	95.8	0	0	0	0	0	35	10	25	1	68	19	53	3	119	47	93	Azimuth_2.0	0.5528	36	6	1.0	1.0	9			Outside Target Window: 5-65%
Input Sequence	5	9606	CRISPRko		antisense	292	GTCAGTGGATATCTGACCCC	AAAGGTCAGTGGATATCTGACCCCTGGCCC	TGG	291	40.7	0	0	0	0	0	52	24	80	1	66	26	99	4	167	81	264	Azimuth_2.0	0.5585	33	9	1.0	1.0	10			Quota Met
Input Sequence	5	9606	CRISPRko		sense	280	ATTGGCAGAACTACACACCA	CCTGATTGGCAGAACTACACACCAGGGCCA	GGG	279	39.0	0	0	0	0	2	63	28	68	5	66	41	70	3	177	99	261	Azimuth_2.0	0.7594	1	41	1.0	1.0	11			Spacing Violation: Too close to earlier pick at position 245
Input Sequence	5	9606	CRISPRko		antisense	228	TGTGGTAGATCCACAGATCA	TGTGTGTGGTAGATCCACAGATCAAGGATA	AGG	227	31.7	0	0	0	0	1	25	5	25	5	65	18	57	2	101	39	87	Azimuth_2.0	0.5663	30	13	1.0	1.0	12			Spacing Violation: Too close to earlier pick at position 245
Input Sequence	5	9606	CRISPRko		antisense	465	GGGCCACGTGATGAAATGCT	TCTCGGGCCACGTGATGAAATGCTAGGCGG	AGG	464	64.9	0	0	0	0	2	44	13	30	4	58	29	38	5	65	31	80	Azimuth_2.0	0.6429	10	34	1.0	1.0	13			Spacing Violation: Too close to earlier pick at position 461
Input Sequence	5	9606	CRISPRko		sense	80	CTGGCTAGAAGCACAAGAGG	GTGCCTGGCTAGAAGCACAAGAGGAGGAGG	AGG	79	11.0	0	0	0	0	1	74	32	55	5	110	31	83	23	142	45	121	Azimuth_2.0	0.5991	19	25	1.0	1.0	14			Spacing Violation: Too close to earlier pick at position 76
Input Sequence	5	9606	CRISPRko		antisense	53	TAGCCAGGCACAAGCAGCAT	CTTCTAGCCAGGCACAAGCAGCATTGGTAG	TGG	52	7.3	0	0	0	0	0	44	18	45	8	166	61	127	13	243	84	204	Azimuth_2.0	0.5431	38	8	1.0	1.0	15			Spacing Violation: Too close to earlier pick at position 76
Input Sequence	5	9606	CRISPRko		sense	530	CTGACATCGAGCTTGCTACA	ACTGCTGACATCGAGCTTGCTACAAGGGAC	AGG	529	74.0	0	0	0	0	0	19	15	22	0	35	6	35	2	44	14	40	Azimuth_2.0	0.5158	48	2	1.0	1.0	16			Outside Target Window: 5-65%
Input Sequence	5	9606	CRISPRko		sense	442	AGAGAGAAGTGTTAGAGTGG	CCTGAGAGAGAAGTGTTAGAGTGGAGGTTT	AGG	441	61.7	0	0	0	0	1	104	39	99	5	121	46	113	1	141	43	126	Azimuth_2.0	0.5816	23	27	1.0	1.0	17			Spacing Violation: Too close to earlier picks at positions 425, 461
Input Sequence	5	9606	CRISPRko		sense	279	GATTGGCAGAACTACACACC	CCCTGATTGGCAGAACTACACACCAGGGCC	AGG	278	38.9	0	0	0	0	2	21	10	16	1	69	32	86	4	113	47	108	Azimuth_2.0	0.5924	21	29	1.0	1.0	18			Spacing Violation: Too close to earlier pick at position 245
Input Sequence	5	9606	CRISPRko		antisense	636	TAACCAGAGAGACCCAGTAC	GGTCTAACCAGAGAGACCCAGTACAGGCAA	AGG	635	88.8	0	0	0	0	2	52	23	31	9	124	40	98	10	150	48	122	Azimuth_2.0	0.6205	14	37	1.0	1.0	19			Outside Target Window: 5-65%
Input Sequence	5	9606	CRISPRko		antisense	115	ATTGGTCTTAAAGGTACCTG	AGTCATTGGTCTTAAAGGTACCTGAGGTGT	AGG	114	15.9	0	0	0	0	3	41	22	30	3	47	16	37	1	78	26	65	Azimuth_2.0	0.6873	4	47	1.0	1.0	20			Quota Met
Input Sequence	5	9606	CRISPRko		sense	137	TTTAAGACCAATGACTTACA	TACCTTTAAGACCAATGACTTACAAGGCAG	AGG	136	19.0	0	0	0	0	0	67	30	64	4	94	55	112	5	139	70	166	Azimuth_2.0	0.5300	42	10	1.0	1.0	21			Quota Met
Input Sequence	5	9606	CRISPRko		antisense	264	GTGTGTAGTTCTGCCAATCA	CCTGGTGTGTAGTTCTGCCAATCAGGGAAG	GGG	263	36.8	0	0	0	0	1	27	21	42	1	69	27	87	4	131	46	118	Azimuth_2.0	0.5515	37	16	1.0	1.0	22			Spacing Violation: Too close to earlier pick at position 245
Input Sequence	5	9606	CRISPRko		sense	347	AGTACCAGTTGAGCCAGATA	AGCTAGTACCAGTTGAGCCAGATAAGGTAG	AGG	346	48.4	0	0	0	0	1	29	7	28	7	83	41	83	9	87	40	98	Azimuth_2.0	0.5404	39	17	1.0	1.0	23			Quota Met
Input Sequence	5	9606	CRISPRko		sense	229	GACAAGATATCCTTGATCTG	CGAAGACAAGATATCCTTGATCTGTGGATC	TGG	228	31.9	0	0	0	0	3	54	18	53	6	75	26	84	15	147	49	131	Azimuth_2.0	0.6382	12	49	1.0	1.0	24			Spacing Violation: Too close to earlier pick at position 245
Input Sequence	5	9606	CRISPRko		antisense	399	CCATTCCATGCAGGCTCACA	TCATCCATTCCATGCAGGCTCACAGGGTGT	GGG	398	55.7	0	0	0	0	2	51	30	53	11	136	61	135	9	181	70	197	Azimuth_2.0	0.5757	26	36	1.0	1.0	25			Spacing Violation: Too close to earlier picks at positions 385, 425
Input Sequence	5	9606	CRISPRko		antisense	314	TAGCTTGTAGCACCATCCAA	GTACTAGCTTGTAGCACCATCCAAAGGTCA	AGG	313	43.8	0	0	0	0	4	40	17	51	2	52	30	55	7	54	18	42	Azimuth_2.0	0.6677	5	60	1.0	1.0	26			Quota Met
Input Sequence	5	9606	CRISPRko		sense	287	GAACTACACACCAGGGCCAG	GGCAGAACTACACACCAGGGCCAGGGGTCA	GGG	286	40.0	0	0	0	0	3	136	60	125	9	140	39	112	11	213	74	214	Azimuth_2.0	0.6538	9	56	1.0	1.0	27			Quota Met
Input Sequence	5	9606	CRISPRko		sense	544	GCTACAAGGGACTTTCCGCT	GCTTGCTACAAGGGACTTTCCGCTGGGGAC	GGG	543	75.9	0	0	0	0	1	19	8	15	3	34	15	40	2	40	16	40	Azimuth_2.0	0.5060	55	12	1.0	1.0	28			Outside Target Window: 5-65%
Input Sequence	5	9606	CRISPRko		sense	313	GATATCCACTGACCTTTGGA	GTCAGATATCCACTGACCTTTGGATGGTGC	TGG	312	43.6	0	0	0	0	3	140	60	148	5	162	105	212	5	82	37	113	Azimuth_2.0	0.6402	11	57	1.0	1.0	29			Quota Met
Input Sequence	5	9606	CRISPRko		antisense	246	CAGGGAAGTAGCCTTGTGTG	CAATCAGGGAAGTAGCCTTGTGTGTGGTAG	TGG	245	34.3	0	0	0	0	4	57	26	62	4	69	31	76	5	149	47	135	Azimuth_2.0	0.6620	7	62	1.0	1.0	30			Spacing Violation: Too close to earlier pick at position 245
Input Sequence	5	9606	CRISPRko		antisense	307	TAGCACCATCCAAAGGTCAG	CTTGTAGCACCATCCAAAGGTCAGTGGATA	TGG	306	42.8	0	0	0	0	3	61	35	94	9	209	97	311	11	164	74	194	Azimuth_2.0	0.6147	16	54	1.0	1.0	31			Quota Met
Input Sequence	5	9606	CRISPRko		antisense	672	TAGTTAGCCAGAGAGCTCCC	TCCCTAGTTAGCCAGAGAGCTCCCAGGCTC	AGG	671	93.8	0	0	0	0	2	125	51	75	4	96	33	76	4	107	43	73	Azimuth_2.0	0.5748	27	45	1.0	1.0	32			Outside Target Window: 5-65%
Input Sequence	5	9606	CRISPRko		sense	543	TGCTACAAGGGACTTTCCGC	AGCTTGCTACAAGGGACTTTCCGCTGGGGA	TGG	542	75.8	0	0	0	0	0	14	8	12	3	31	9	64	2	30	7	30	Azimuth_2.0	0.4458	71	1	1.0	1.0	33			Outside Target Window: 5-65%
Input Sequence	5	9606	CRISPRko		antisense	486	AGTACTCCGGATGCAGCTCT	TTGAAGTACTCCGGATGCAGCTCTCGGGCC	CGG	485	67.8	0	0	0	0	1	36	14	29	5	51	13	50	5	49	12	39	Azimuth_2.0	0.5072	53	19	1.0	1.0	34			Outside Target Window: 5-65%; Spacing Violation: Too close to earlier pick at position 461
Input Sequence	5	9606	CRISPRko		antisense	408	CAGGGTCATCCATTCCATGC	CTCTCAGGGTCATCCATTCCATGCAGGCTC	AGG	407	56.9	0	0	0	0	2	30	15	27	4	67	23	50	10	99	31	85	Azimuth_2.0	0.5300	43	30	1.0	1.0	35			Spacing Violation: Too close to earlier picks at positions 385, 425
Input Sequence	5	9606	CRISPRko		sense	531	TGACATCGAGCTTGCTACAA	CTGCTGACATCGAGCTTGCTACAAGGGACT	GGG	530	74.1	0	0	0	0	2	17	12	21	6	109	45	180	3	72	34	80	Azimuth_2.0	0.5179	47	28	1.0	1.0	36			Outside Target Window: 5-65%
Input Sequence	5	9606	CRISPRko		antisense	661	AGAGCTCCCAGGCTCAAATC	CCAGAGAGCTCCCAGGCTCAAATCTGGTCT	TGG	660	92.3	0	0	0	0	0	33	10	20	11	67	45	49	8	235	98	179	Azimuth_2.0	0.4428	72	5	1.0	1.0	37			Outside Target Window: 5-65%
Input Sequence	5	9606	CRISPRko		sense	491	CGTGGCCCGAGAGCTGCATC	ATCACGTGGCCCGAGAGCTGCATCCGGAGT	CGG	490	68.5	0	0	0	0	2	44	9	32	14	80	28	38	17	114	33	81	Azimuth_2.0	0.5296	44	33	1.0	1.0	38			Outside Target Window: 5-65%; Spacing Violation: Too close to earlier pick at position 461
Input Sequence	5	9606	CRISPRko		antisense	548	CCTCCCTGGAAAGTCCCCAG	CACGCCTCCCTGGAAAGTCCCCAGCGGAAA	CGG	547	76.5	0	0	0	0	8	102	29	80	20	175	49	156	15	323	103	246	Azimuth_2.0	0.7468	3	77	1.0	1.0	39			Outside Target Window: 5-65%
Input Sequence	5	9606	CRISPRko		sense	286	AGAACTACACACCAGGGCCA	TGGCAGAACTACACACCAGGGCCAGGGGTC	GGG	285	39.9	0	0	0	0	5	73	33	65	6	126	45	84	4	115	37	118	Azimuth_2.0	0.6058	18	64	1.0	1.0	40			Quota Met
Input Sequence	5	9606	CRISPRko		sense	187	AAGAAAAGGGGGGACTGGAA	TTAAAAGAAAAGGGGGGACTGGAAGGGCTA	GGG	186	26.0	0	0	0	0	3	183	68	139	4	217	129	302	1	225	143	213	Azimuth_2.0	0.5802	24	58	1.0	1.0	41			Quota Met
Input Sequence	5	9606	CRISPRko		antisense	133	ACAGCTGCCTTGTAAGTCAT	ATCTACAGCTGCCTTGTAAGTCATTGGTCT	TGG	132	18.5	0	0	0	0	3	45	8	39	1	60	21	63	6	133	41	125	Azimuth_2.0	0.5530	35	48	1.0	1.0	42			Quota Met
Input Sequence	5	9606	CRISPRko		sense	309	GTCAGATATCCACTGACCTT	AGGGGTCAGATATCCACTGACCTTTGGATG	TGG	308	43.1	0	0	0	0	1	34	12	32	3	49	25	69	1	155	51	150	Azimuth_2.0	0.4464	69	18	1.0	1.0	43			Quota Met
Input Sequence	5	9606	CRISPRko		antisense	210	CAAGGATATCTTGTCTTCGT	AGATCAAGGATATCTTGTCTTCGTTGGGAG	TGG	209	29.2	0	0	0	0	0	38	11	31	0	29	13	30	3	48	29	56	Azimuth_2.0	0.3937	81	7	1.0	1.0	44			Quota Met
Input Sequence	5	9606	CRISPRko		sense	356	TGAGCCAGATAAGGTAGAAG	CAGTTGAGCCAGATAAGGTAGAAGAGGCCA	AGG	355	49.7	0	0	0	0	3	76	18	60	6	152	47	110	10	118	58	120	Azimuth_2.0	0.5561	34	55	1.0	1.0	45			Spacing Violation: Too close to earlier pick at position 385
Input Sequence	5	9606	CRISPRko		antisense	499	CAGCAGTTCTTGAAGTACTC	ATGTCAGCAGTTCTTGAAGTACTCCGGATG	CGG	498	69.7	0	0	0	0	4	48	17	27	7	76	35	62	5	116	38	84	Azimuth_2.0	0.5601	32	61	1.0	1.0	46			Outside Target Window: 5-65%
Input Sequence	5	9606	CRISPRko		antisense	265	GGTGTGTAGTTCTGCCAATC	CCCTGGTGTGTAGTTCTGCCAATCAGGGAA	AGG	264	36.9	0	0	0	0	1	26	9	14	3	45	17	48	2	82	30	58	Azimuth_2.0	0.4090	78	15	1.0	1.0	47			Spacing Violation: Too close to earlier pick at position 245
Input Sequence	5	9606	CRISPRko		antisense	209	AAGGATATCTTGTCTTCGTT	GATCAAGGATATCTTGTCTTCGTTGGGAGT	GGG	208	29.1	0	0	0	0	2	36	14	47	1	59	20	60	1	72	36	105	Azimuth_2.0	0.4721	62	31	1.0	1.0	48			Quota Met
Input Sequence	5	9606	CRISPRko		sense	110	GGGTTTTCCAGTCACACCTC	AGGTGGGTTTTCCAGTCACACCTCAGGTAC	AGG	109	15.2	0	0	0	0	3	54	19	69	6	89	26	107	5	245	85	233	Azimuth_2.0	0.5203	46	50	1.0	1.0	49			Spacing Violation: Too close to earlier pick at position 76; Transcriptional Incompatibility ('TTTT')
Input Sequence	5	9606	CRISPRko		sense	262	CACAAGGCTACTTCCCTGAT	CACACACAAGGCTACTTCCCTGATTGGCAG	TGG	261	36.5	0	0	0	0	2	54	16	54	3	81	26	58	7	93	42	83	Azimuth_2.0	0.4860	59	38	1.0	1.0	50			Spacing Violation: Too close to earlier pick at position 245
Input Sequence	5	9606	CRISPRko		antisense	106	AAAGGTACCTGAGGTGTGAC	TCTTAAAGGTACCTGAGGTGTGACTGGAAA	TGG	105	14.7	0	0	0	0	2	49	28	44	3	71	21	52	10	105	26	81	Azimuth_2.0	0.4656	66	35	1.0	1.0	51			Spacing Violation: Too close to earlier pick at position 76
Input Sequence	5	9606	CRISPRko		sense	90	GCACAAGAGGAGGAGGAGGT	AGAAGCACAAGAGGAGGAGGAGGTGGGTTT	GGG	89	12.4	0	0	0	0	133	1010	350	943	102	898	351	688	334	1847	696	1464	Azimuth_2.0	0.6192	15	87	1.0	1.0	52			Spacing Violation: Too close to earlier pick at position 76
Input Sequence	5	9606	CRISPRko		sense	439	CTGAGAGAGAAGTGTTAGAG	GACCCTGAGAGAGAAGTGTTAGAGTGGAGG	TGG	438	61.3	0	0	0	0	2	194	64	159	4	280	91	296	6	320	137	298	Azimuth_2.0	0.5007	57	46	1.0	1.0	53			Spacing Violation: Too close to earlier picks at positions 425, 461
Input Sequence	5	9606	CRISPRko		antisense	485	GTACTCCGGATGCAGCTCTC	TGAAGTACTCCGGATGCAGCTCTCGGGCCA	GGG	484	67.7	0	0	0	0	3	60	21	31	13	68	30	39	5	88	18	56	Azimuth_2.0	0.5062	54	52	1.0	1.0	54			Outside Target Window: 5-65%; Spacing Violation: Too close to earlier pick at position 461
Input Sequence	5	9606	CRISPRko		sense	410	CCCTGTGAGCCTGCATGGAA	TACACCCTGTGAGCCTGCATGGAATGGATG	TGG	409	57.2	0	0	0	0	6	83	25	69	9	162	60	144	8	148	37	127	Azimuth_2.0	0.5339	40	70	1.0	1.0	55			Spacing Violation: Too close to earlier picks at positions 385, 425
Input Sequence	5	9606	CRISPRko		antisense	340	TCTACCTTATCTGGCTCAAC	CTCTTCTACCTTATCTGGCTCAACTGGTAC	TGG	339	47.4	0	0	0	0	2	42	11	26	5	49	12	42	6	48	25	62	Azimuth_2.0	0.3933	82	32	1.0	1.0	57			Quota Met
Input Sequence	5	9606	CRISPRko		antisense	286	GGATATCTGACCCCTGGCCC	CAGTGGATATCTGACCCCTGGCCCTGGTGT	TGG	285	39.9	0	0	0	0	2	117	39	87	7	210	73	186	6	156	42	153	Azimuth_2.0	0.4464	70	44	1.0	1.0	58			Quota Met
Input Sequence	5	9606	CRISPRko		sense	405	TTACACCCTGTGAGCCTGCA	CTTGTTACACCCTGTGAGCCTGCATGGAAT	TGG	404	56.5	0	0	0	0	7	81	31	96	23	367	134	323	15	806	302	773	Azimuth_2.0	0.5314	41	74	1.0	1.0	59			Spacing Violation: Too close to earlier picks at positions 385, 425
Input Sequence	5	9606	CRISPRko		sense	177	CACTTTTTAAAAGAAAAGGG	TAGCCACTTTTTAAAAGAAAAGGGGGGACT	GGG	176	24.6	0	2	4	5	13	928	329	855	7	819	278	686	11	1156	361	932	Azimuth_2.0	0.6116	17	99	1.0	1.0	60			Off-target Match Bin I matches > 3; Transcriptional Incompatibility ('TTTT')
Input Sequence	5	9606	CRISPRko		sense	176	CCACTTTTTAAAAGAAAAGG	TTAGCCACTTTTTAAAAGAAAAGGGGGGAC	GGG	175	24.5	0	0	0	2	5	723	268	688	5	657	250	573	14	938	336	769	Azimuth_2.0	0.5712	28	88	1.0	1.0	61			Transcriptional Incompatibility ('TTTT')
Input Sequence	5	9606	CRISPRko		antisense	124	TTGTAAGTCATTGGTCTTAA	TGCCTTGTAAGTCATTGGTCTTAAAGGTAC	AGG	123	17.2	0	0	0	0	1	55	32	44	5	120	51	104	0	117	57	107	Azimuth_2.0	0.3014	93	23	1.0	1.0	62			Quota Met
Input Sequence	5	9606	CRISPRko		sense	564	GGGGACTTTCCAGGGAGGCG	CGCTGGGGACTTTCCAGGGAGGCGTGGCCT	TGG	563	78.7	0	0	0	0	5	100	29	63	7	101	19	84	14	101	26	73	Azimuth_2.0	0.5041	56	66	1.0	1.0	63			Outside Target Window: 5-65%
Input Sequence	5	9606	CRISPRko		sense	559	CCGCTGGGGACTTTCCAGGG	CTTTCCGCTGGGGACTTTCCAGGGAGGCGT	AGG	558	78.0	0	1	0	1	4	106	24	95	12	140	56	132	10	293	85	229	Azimuth_2.0	0.5696	29	94	1.0	1.0	64			Outside Target Window: 5-65%
Input Sequence	5	9606	CRISPRko		sense	644	TTGCCTGTACTGGGTCTCTC	CTTTTTGCCTGTACTGGGTCTCTCTGGTTA	TGG	643	89.9	0	0	0	0	3	61	23	63	3	108	31	78	9	131	38	96	Azimuth_2.0	0.4384	73	53	1.0	1.0	65			Outside Target Window: 5-65%
Input Sequence	5	9606	CRISPRko		sense	366	AAGGTAGAAGAGGCCAATAA	AGATAAGGTAGAAGAGGCCAATAAAGGAGA	AGG	365	51.0	0	0	0	0	2	57	17	34	14	91	57	99	14	152	54	168	Azimuth_2.0	0.3655	88	39	1.0	1.0	66			Spacing Violation: Too close to earlier pick at position 385
Input Sequence	5	9606	CRISPRko		sense	285	CAGAACTACACACCAGGGCC	TTGGCAGAACTACACACCAGGGCCAGGGGT	AGG	284	39.7	0	0	0	0	5	82	30	77	2	148	39	98	2	191	65	217	Azimuth_2.0	0.4716	63	65	1.0	1.0	67			Quota Met
Input Sequence	5	9606	CRISPRko		sense	556	TTTCCGCTGGGGACTTTCCA	GGACTTTCCGCTGGGGACTTTCCAGGGAGG	GGG	555	77.6	0	0	0	0	6	69	28	56	6	78	33	51	7	75	22	64	Azimuth_2.0	0.4851	60	69	1.0	1.0	68			Outside Target Window: 5-65%
Input Sequence	5	9606	CRISPRko		antisense	602	TGCTTATATGCAGCATCTGA	CAGCTGCTTATATGCAGCATCTGAGGGCTC	GGG	601	84.1	0	0	0	0	7	67	24	59	1	140	53	105	4	125	56	95	Azimuth_2.0	0.4880	58	73	1.0	1.0	69			Outside Target Window: 5-65%
Input Sequence	5	9606	CRISPRko		sense	685	TGGGAGCTCTCTGGCTAACT	AGCCTGGGAGCTCTCTGGCTAACTAGGGAA	AGG	684	95.7	0	0	0	0	2	80	28	75	2	64	29	57	7	129	34	106	Azimuth_2.0	0.3208	91	42	1.0	1.0	70			Outside Target Window: 5-65%
Input Sequence	5	9606	CRISPRko		antisense	400	TCCATTCCATGCAGGCTCAC	GTCATCCATTCCATGCAGGCTCACAGGGTG	AGG	399	55.8	0	0	0	0	4	29	17	30	3	80	45	84	10	109	38	100	Azimuth_2.0	0.4342	74	59	1.0	1.0	71			Spacing Violation: Too close to earlier picks at positions 385, 425
Input Sequence	5	9606	CRISPRko		sense	676	ATTTGAGCCTGGGAGCTCTC	CCAGATTTGAGCCTGGGAGCTCTCTGGCTA	TGG	675	94.4	0	0	0	0	7	159	57	182	4	308	125	263	11	446	149	306	Azimuth_2.0	0.4735	61	75	1.0	1.0	72			Outside Target Window: 5-65%
Input Sequence	5	9606	CRISPRko		sense	580	GGCGTGGCCTGGGCGGGACT	GGGAGGCGTGGCCTGGGCGGGACTGGGGAG	GGG	579	81.0	0	0	0	0	2	116	20	82	18	215	64	189	21	330	95	208	Azimuth_2.0	0.2866	94	43	1.0	1.0	73			Outside Target Window: 5-65%
Input Sequence	5	9606	CRISPRko		sense	83	GCTAGAAGCACAAGAGGAGG	CCTGGCTAGAAGCACAAGAGGAGGAGGAGG	AGG	82	11.5	0	0	1	2	36	539	250	662	118	842	389	1094	29	289	133	283	Azimuth_2.0	0.5267	45	92	1.0	1.0	74			Spacing Violation: Too close to earlier pick at position 76
Input Sequence	5	9606	CRISPRko		antisense	368	GCTGGTGTTCTCTCCTTTAT	ACAAGCTGGTGTTCTCTCCTTTATTGGCCT	TGG	367	51.3	0	0	0	0	2	60	29	54	2	101	35	110	7	186	59	191	Azimuth_2.0	0.1856	99	40	1.0	1.0	75			On-Target Efficacy Score < 0.2; Spacing Violation: Too close to earlier pick at position 385
Input Sequence	5	9606	CRISPRko		sense	175	GCCACTTTTTAAAAGAAAAG	CTTAGCCACTTTTTAAAAGAAAAGGGGGGA	GGG	174	24.3	0	0	1	2	4	688	248	675	14	854	321	782	12	1525	573	1410	Azimuth_2.0	0.5155	49	91	1.0	1.0	76			Transcriptional Incompatibility ('TTTT')
Input Sequence	5	9606	CRISPRko		sense	665	GGTTAGACCAGATTTGAGCC	CTCTGGTTAGACCAGATTTGAGCCTGGGAG	TGG	664	92.9	0	0	1	0	1	31	8	37	3	73	25	56	6	102	43	114	Azimuth_2.0	0.5113	52	89	1.0	1.0	77			Outside Target Window: 5-65%
Input Sequence	5	9606	CRISPRko		sense	86	AGAAGCACAAGAGGAGGAGG	GGCTAGAAGCACAAGAGGAGGAGGAGGTGG	AGG	85	11.9	0	0	1	0	195	1373	604	1576	73	695	227	545	31	622	180	544	Azimuth_2.0	0.5120	51	90	1.0	1.0	78			Spacing Violation: Too close to earlier pick at position 76
Input Sequence	5	9606	CRISPRko		sense	186	AAAGAAAAGGGGGGACTGGA	TTTAAAAGAAAAGGGGGGACTGGAAGGGCT	AGG	185	25.9	0	0	0	0	7	262	108	255	9	266	98	199	4	200	78	160	Azimuth_2.0	0.4646	67	76	1.0	1.0	79			Quota Met
Input Sequence	5	9606	CRISPRko		antisense	603	CTGCTTATATGCAGCATCTG	GCAGCTGCTTATATGCAGCATCTGAGGGCT	AGG	602	84.2	0	0	0	0	10	52	29	54	7	85	26	114	6	122	51	107	Azimuth_2.0	0.4705	64	80	1.0	1.0	80			Outside Target Window: 5-65%
Input Sequence	5	9606	CRISPRko		sense	573	CCAGGGAGGCGTGGCCTGGG	CTTTCCAGGGAGGCGTGGCCTGGGCGGGAC	CGG	572	80.0	0	1	0	1	30	414	109	322	37	506	137	362	27	750	190	367	Azimuth_2.0	0.5121	50	95	1.0	1.0	81			Outside Target Window: 5-65%
Input Sequence	5	9606	CRISPRko		sense	634	CAGCTGCTTTTTGCCTGTAC	TAAGCAGCTGCTTTTTGCCTGTACTGGGTC	TGG	633	88.5	0	0	0	0	3	59	24	49	11	99	32	100	6	145	69	137	Azimuth_2.0	0.2369	97	51	1.0	1.0	83			Outside Target Window: 5-65%; Transcriptional Incompatibility ('TTTT')
Input Sequence	5	9606	CRISPRko		antisense	427	CACTCTAACACTTCTCTCTC	CCTCCACTCTAACACTTCTCTCTCAGGGTC	AGG	426	59.6	0	0	0	0	4	76	41	68	7	143	52	120	8	249	101	212	Azimuth_2.0	0.3708	85	63	1.0	1.0	84			Spacing Violation: Too close to earlier picks at positions 425, 461
Input Sequence	5	9606	CRISPRko		sense	581	GCGTGGCCTGGGCGGGACTG	GGAGGCGTGGCCTGGGCGGGACTGGGGAGT	GGG	580	81.1	0	0	0	0	5	162	75	114	16	257	47	181	42	492	118	246	Azimuth_2.0	0.3801	84	67	1.0	1.0	85			Outside Target Window: 5-65%
Input Sequence	5	9606	CRISPRko		antisense	576	GCCACTCCCCAGTCCCGCCC	GCTCGCCACTCCCCAGTCCCGCCCAGGCCA	AGG	575	80.4	0	0	0	0	11	138	30	94	8	222	78	135	14	204	62	173	Azimuth_2.0	0.4645	68	84	1.0	1.0	86			Outside Target Window: 5-65%
Input Sequence	5	9606	CRISPRko		sense	635	AGCTGCTTTTTGCCTGTACT	AAGCAGCTGCTTTTTGCCTGTACTGGGTCT	GGG	634	88.7	0	0	0	0	6	91	29	75	2	95	36	66	8	205	91	200	Azimuth_2.0	0.3685	86	71	1.0	1.0	87			Outside Target Window: 5-65%; Transcriptional Incompatibility ('TTTT')
Input Sequence	5	9606	CRISPRko		antisense	562	CCGCCCAGGCCACGCCTCCC	AGTCCCGCCCAGGCCACGCCTCCCTGGAAA	TGG	561	78.5	0	0	0	0	11	109	27	92	41	361	100	246	42	638	130	413	Azimuth_2.0	0.4088	79	83	1.0	1.0	88			Outside Target Window: 5-65%
Input Sequence	5	9606	CRISPRko		antisense	165	CCCCCTTTTCTTTTAAAAAG	AGTCCCCCCTTTTCTTTTAAAAAGTGGCTA	TGG	164	22.9	0	0	0	0	9	666	189	522	6	519	153	419	27	913	350	803	Azimuth_2.0	0.3874	83	79	1.0	1.0	89			Transcriptional Incompatibility ('TTTT')
Input Sequence	5	9606	CRISPRko		antisense	349	TTGGCCTCTTCTACCTTATC	TTTATTGGCCTCTTCTACCTTATCTGGCTC	TGG	348	48.7	0	0	0	0	6	56	11	34	6	87	42	70	14	147	61	150	Azimuth_2.0	0.2734	95	68	1.0	1.0	90			Quota Met
Input Sequence	5	9606	CRISPRko		sense	570	TTTCCAGGGAGGCGTGGCCT	GGACTTTCCAGGGAGGCGTGGCCTGGGCGG	GGG	569	79.6	0	0	0	0	8	132	30	94	17	227	69	201	33	413	113	339	Azimuth_2.0	0.3670	87	78	1.0	1.0	91			Outside Target Window: 5-65%
Input Sequence	5	9606	CRISPRko		sense	555	CTTTCCGCTGGGGACTTTCC	GGGACTTTCCGCTGGGGACTTTCCAGGGAG	AGG	554	77.5	0	0	0	0	7	62	24	43	2	63	13	48	3	63	17	52	Azimuth_2.0	0.2506	96	72	1.0	1.0	92			Outside Target Window: 5-65%
Input Sequence	5	9606	CRISPRko		sense	586	GCCTGGGCGGGACTGGGGAG	CGTGGCCTGGGCGGGACTGGGGAGTGGCGA	TGG	585	81.8	0	0	0	0	10	475	123	272	39	556	155	303	23	458	105	278	Azimuth_2.0	0.3402	90	82	1.0	1.0	93			Outside Target Window: 5-65%
Input Sequence	5	9606	CRISPRko		sense	182	TTTAAAAGAAAAGGGGGGAC	ACTTTTTAAAAGAAAAGGGGGGACTGGAAG	TGG	181	25.3	0	2	1	2	4	498	166	414	10	679	223	515	12	1100	323	859	Azimuth_2.0	0.4313	75	97	1.0	1.0	94			Off-target Match Bin I matches > 3
Input Sequence	5	9606	CRISPRko		sense	574	CAGGGAGGCGTGGCCTGGGC	TTTCCAGGGAGGCGTGGCCTGGGCGGGACT	GGG	573	80.1	0	2	0	3	33	422	93	246	38	435	97	265	26	723	179	436	Azimuth_2.0	0.4111	77	96	1.0	1.0	95			Off-target Match Bin I matches > 3; Outside Target Window: 5-65%
Input Sequence	5	9606	CRISPRko		sense	174	AGCCACTTTTTAAAAGAAAA	TCTTAGCCACTTTTTAAAAGAAAAGGGGGG	GGG	173	24.2	0	2	2	1	8	735	283	760	15	805	266	641	13	1777	617	1661	Azimuth_2.0	0.4135	76	98	1.0	1.0	96			Off-target Match Bin I matches > 3; Transcriptional Incompatibility ('TTTT')
Input Sequence	5	9606	CRISPRko		sense	89	AGCACAAGAGGAGGAGGAGG	TAGAAGCACAAGAGGAGGAGGAGGTGGGTT	TGG	88	12.3	MAX	MAX	MAX	MAX	MAX	MAX	MAX	MAX	MAX	MAX	MAX	MAX	MAX	MAX	MAX	MAX	Azimuth_2.0	0.4071	80	100	1.0	1.0	97			Off-target Match Bin I matches > 3; Spacing Violation: Too close to earlier pick at position 76
Input Sequence	5	9606	CRISPRko		sense	579	AGGCGTGGCCTGGGCGGGAC	AGGGAGGCGTGGCCTGGGCGGGACTGGGGA	TGG	578	80.8	0	0	0	0	15	92	14	49	20	121	29	101	36	238	81	164	Azimuth_2.0	0.2180	98	85	1.0	1.0	98			Outside Target Window: 5-65%
Input Sequence	5	9606	CRISPRko		sense	173	TAGCCACTTTTTAAAAGAAA	ATCTTAGCCACTTTTTAAAAGAAAAGGGGG	AGG	172	24.1	0	1	0	0	9	405	142	321	5	482	148	450	16	790	260	744	Azimuth_2.0	0.3084	92	93	1.0	1.0	99			Transcriptional Incompatibility ('TTTT')
Input Sequence	5	9606	CRISPRko		sense	569	CTTTCCAGGGAGGCGTGGCC	GGGACTTTCCAGGGAGGCGTGGCCTGGGCG	TGG	568	79.4	0	0	0	0	16	134	29	98	23	239	73	152	40	257	57	155	Azimuth_2.0	0.1756	100	86	1.0	1.0	100			On-Target Efficacy Score < 0.2; Outside Target Window: 5-65%
